# Supplementary material for: Engineering of appropriate pore size combined with sulfonic functionalization in a Zr-MOF with reo topology for the ultra-high removal of cationic malachite green dye from an aqueous medium
Source: Royal Society of Chemistry journal article supplement (doi:10.1039/d2ra05787e), 2022-01-01
Supplement: d2ra05787e1.pdf [file d2ra05787e1.pdf]

## Supporting information

### **Engineering of appropriate pore size combined with sulfonic functionalization in a Zr-MOF with reo topology for the ultra-high removal of cationic malachite green dye from an aqueous medium**

My V. Nguyen,<sup>\*,a</sup> Hung N. Nguyen,<sup>a</sup> Tuyet A. T. Nguyen<sup>a</sup> and Khang M. V. Nguyen<sup>a</sup>

<sup>a</sup> Faculty of Chemistry, Ho Chi Minh City University of Education, Ho Chi Minh City, 700000, Vietnam.

\*To whom correspondence should be addressed: [mynv@hcmue.edu.vn](mailto:mynv@hcmue.edu.vn)

---

## Table of Contents

---

|                    |                                                                                                                                                         |                |
|--------------------|---------------------------------------------------------------------------------------------------------------------------------------------------------|----------------|
| <b>Section S1</b>  | <i>Synthesis of materials</i>                                                                                                                           | <b>S3</b>      |
| <b>Section S2</b>  | <i>The modelling structure of DUT-52</i>                                                                                                                | <b>S4</b>      |
| <b>Section S3</b>  | <i><math>^1\text{H}</math>-NMR analyses of digested <math>\text{DMA}@\text{Reo-MOF-1}</math>, and digested <math>\text{H}^+@\text{Reo-MOF-1}</math></i> | <b>S5-S6</b>   |
| <b>Section S4</b>  | <i>Powder X-ray diffraction patterns (PXRD)</i>                                                                                                         | <b>S7</b>      |
| <b>Section S5</b>  | <i>Thermogravimetric analysis (TGA) and Differential scanning calorimetry (DSC) curves</i>                                                              | <b>S8-S9</b>   |
| <b>Section S6</b>  | <i><math>\text{N}_2</math> adsorption measurement at 77 K</i>                                                                                           | <b>S10</b>     |
| <b>Section S7</b>  | <i>Scanning electron microscopy (SEM) and energy-dispersive X-ray mapping (EDX-mapping) analysis</i>                                                    | <b>S11-S12</b> |
| <b>Section S8</b>  | <i>Transmission electron microscopy (TEM) analysis</i>                                                                                                  | <b>S13-S14</b> |
| <b>Section S9</b>  | <i>Adsorption studies</i>                                                                                                                               | <b>S15-S19</b> |
| <b>Section S10</b> | <i>The stability of <math>\text{H}^+@\text{Reo-MOF-1}</math> during the adsorption and desorption process of MG</i>                                     | <b>S20-S21</b> |

---

## **Section S1. Synthesis of the materials**

### **Synthesis of 4-sulfonaphthalene-2,6-dicarboxylic acid (H<sub>3</sub>SNDC) linker**

2,6-naphthalenedicarboxylic acid (H<sub>2</sub>NDC) (1 g, 4.63 mmol) was dissolved in a mixture containing 1.75 mL of oleum (SO<sub>3</sub> in concentrated H<sub>2</sub>SO<sub>4</sub>, 25 wt%) and 3.25 mL of concentrated H<sub>2</sub>SO<sub>4</sub>. The mixture was then introduced into a 50 mL glass flask and stirred at 130 °C for 24 h. The product was cooled to room temperature and added to 100 mL of distilled water, filtered and precipitated by 25 mL of concentrated HCl (37 wt%). Finally, the product was filtered, washed with 50 mL of concentrated HCl, and dried at 80 °C under a dynamic vacuum for 24 h to obtain a pure white solid with 80% yield, termed H<sub>3</sub>SNDC.

### **Synthesis of DUT-52**

A mixture of ZrCl<sub>4</sub> (230 mg, 0.986 mmol) and H<sub>2</sub>NDC (216 mg, 1.000 mmol) was added to a 50 mL Pyrex vial containing DMF (20 mL) and acetic acid (1.1 mL). The mixture was then ultrasonicated in 10 min and heated at 120 °C for 48 h. Next, the solid was centrifugated, washed with DMF for 48 h (30 mL per day), and exchanged with MeOH for 48 h (30 mL per day). Finally, the product was collected, dried, and activated under vacuum at 80 °C for 24 h to obtain a white powder, namely DUT-52.

## Section S2. The modelling structure of DUT-52

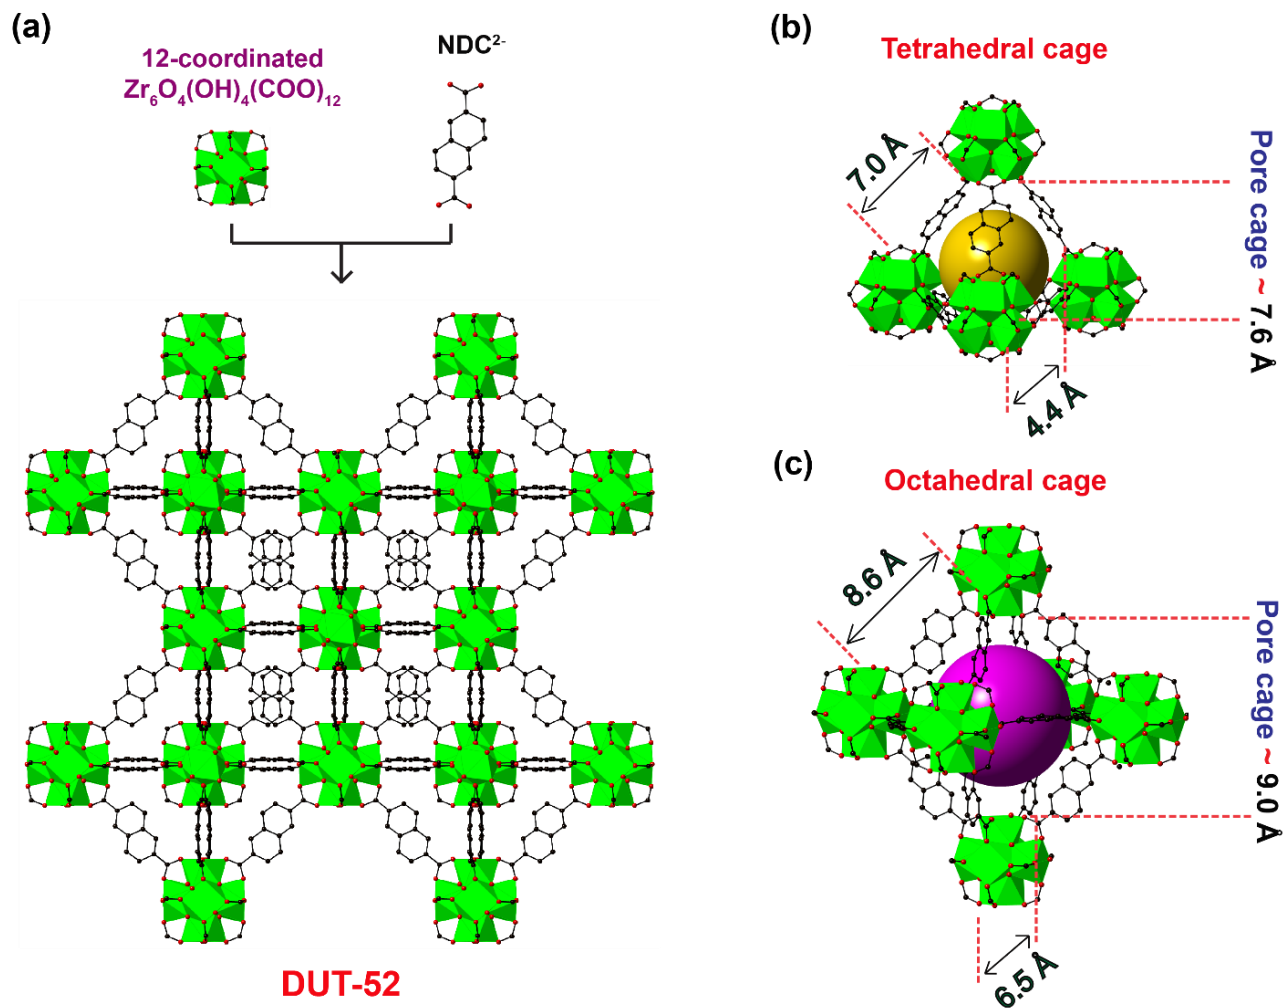

**Figure S1.** The structure of DUT-52 viewing along the [0 0 1] plane. Atom colors: Zr, green polyhedra; C, black; O, red; all H atoms are omitted for clarity. The pore window and cage size of the material is calculated in the CrystalMarker software.

**Section S3.**  $^1\text{H}$ -NMR analyses of digested  $\text{DMA}_{\text{C}}\text{Reo-MOF-1}$ , and digested  $\text{H}^+_{\text{C}}\text{Reo-MOF-1}$

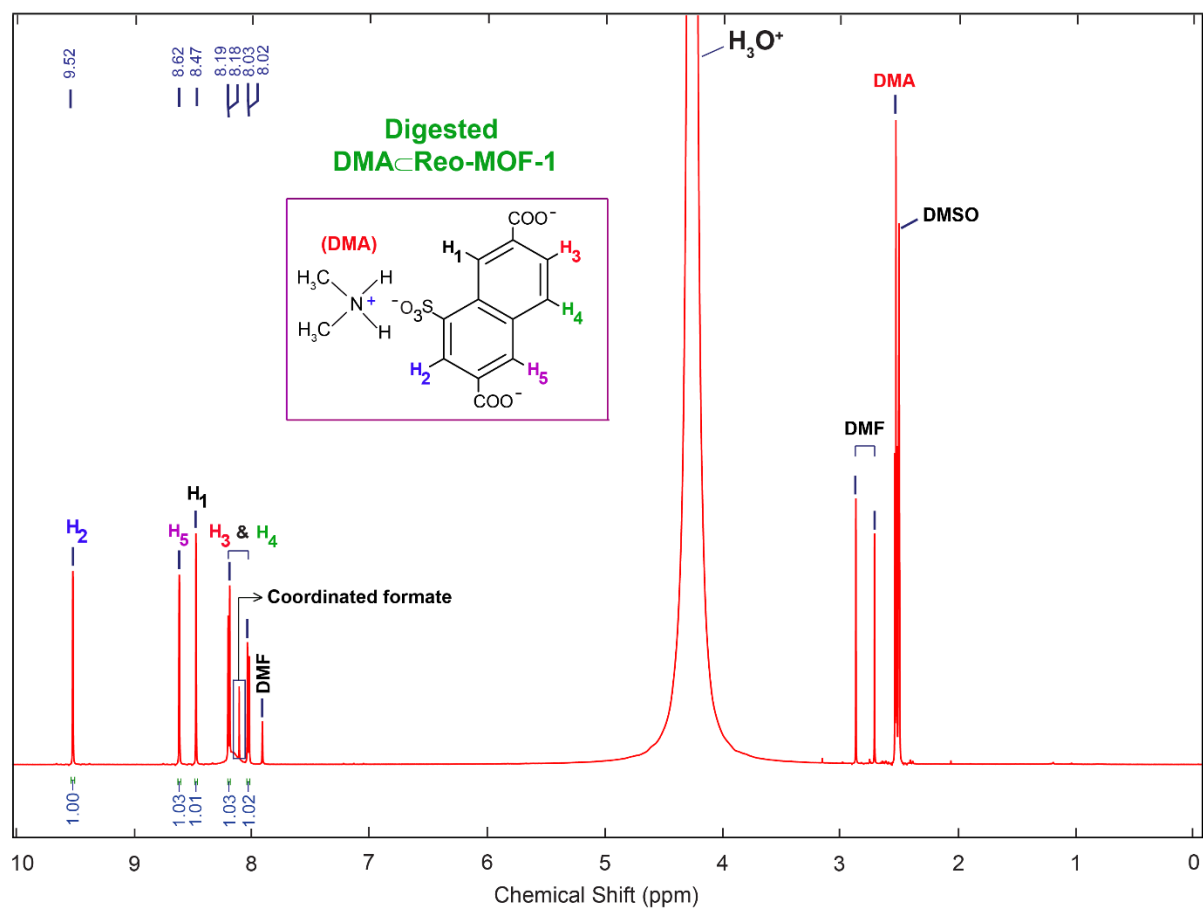

**Figure S2.**  $^1\text{H}$ -NMR analysis of digested  $\text{DMA}_{\text{C}}\text{Reo-MOF-1}$ .

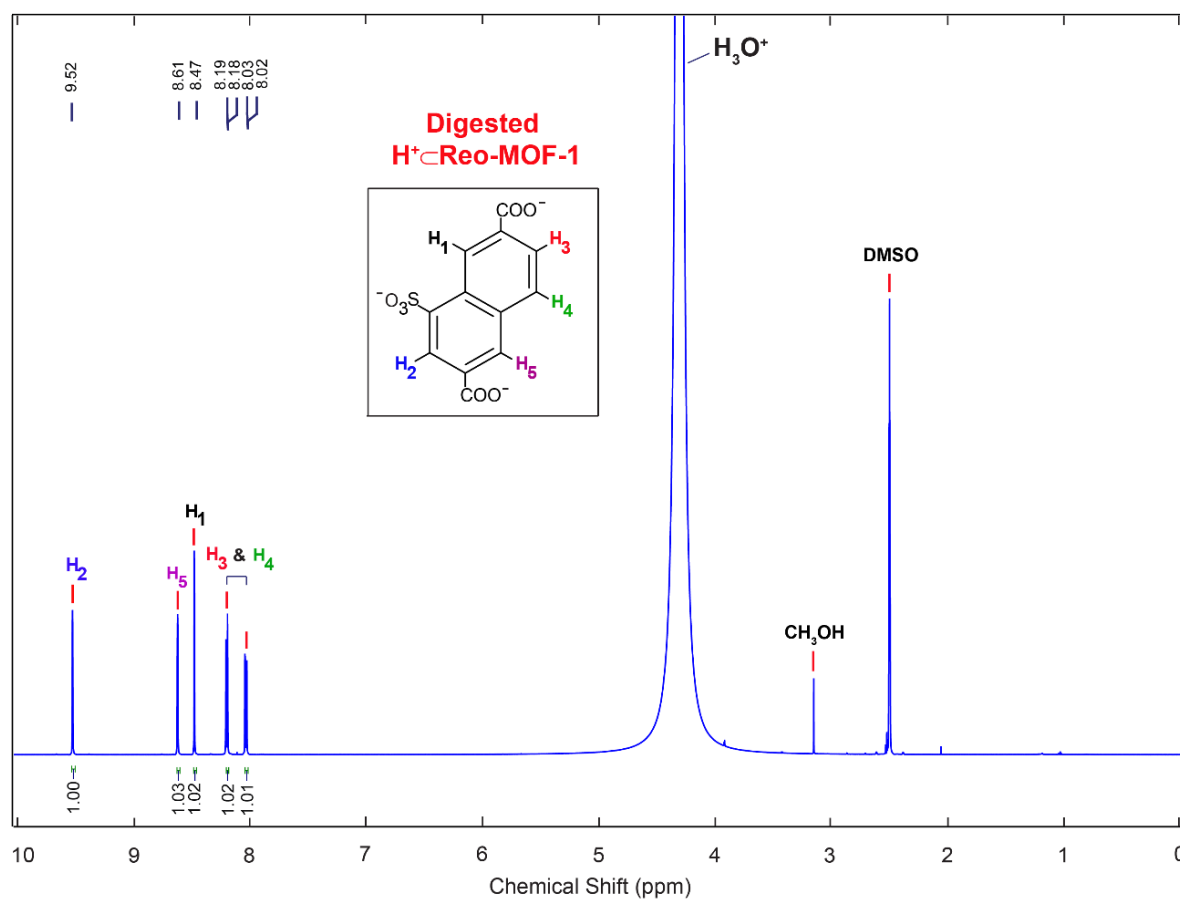

**Figure S3.**  $^1\text{H}$ -NMR analysis of digested  $\text{H}^+\text{Reo-MOF-1}$ .

#### Section S4. Powder X-ray diffraction patterns (PXRD)

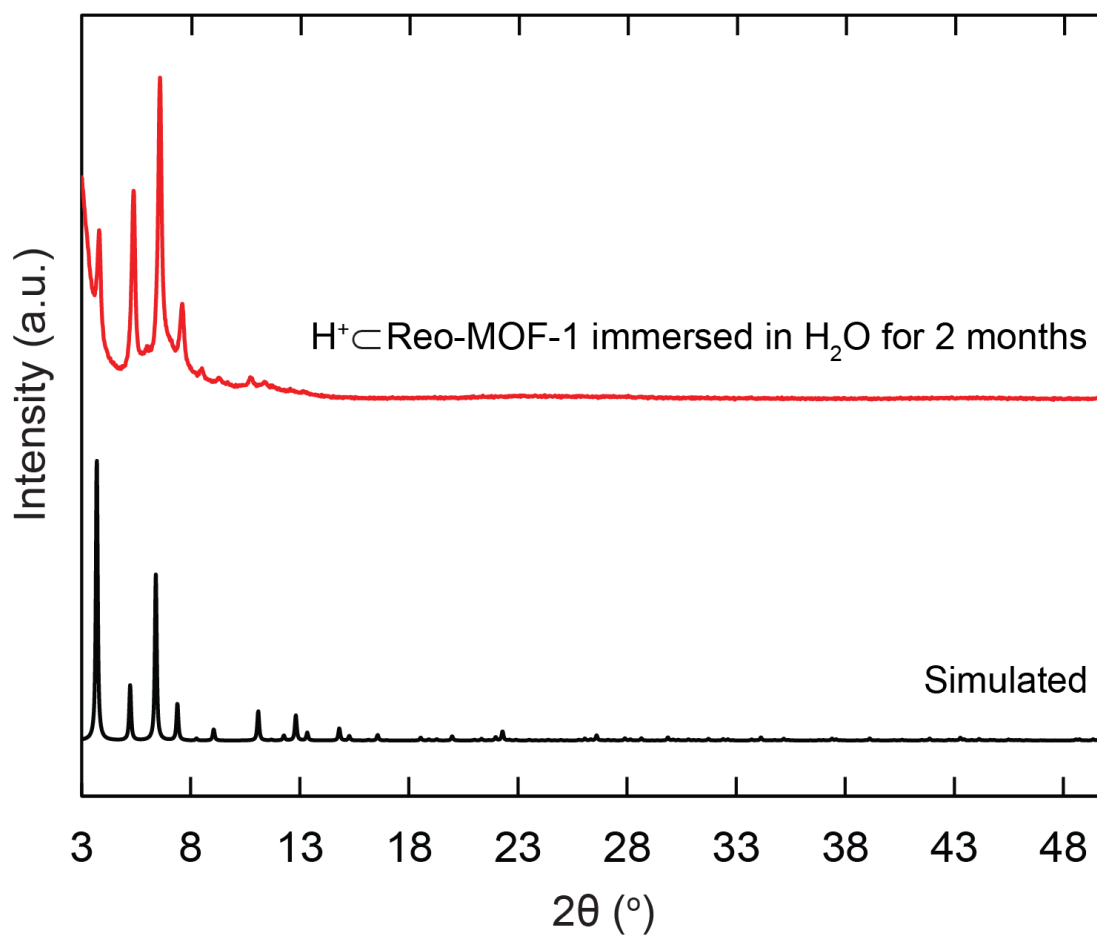

**Figure S4.** PXRD patterns of simulated structure with reo topology (black) in comparison with H<sup>+</sup>⊂Reo-MOF-1 soaked in water for 2 months.

**Section S5.** Thermogravimetric analysis (TGA) and Differential scanning calorimetry (DSC) curves

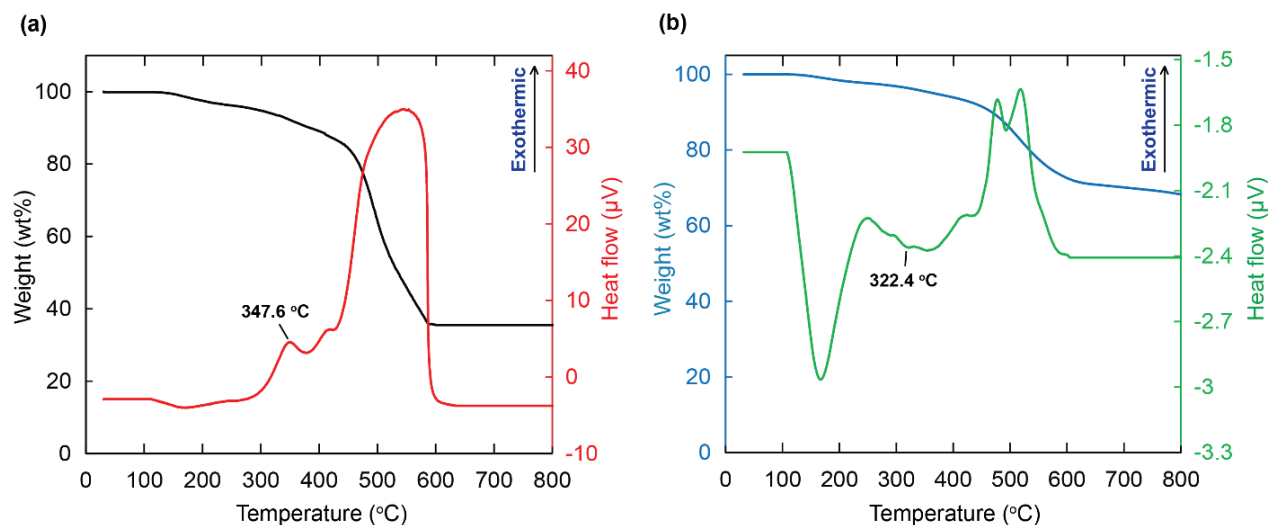

**Figure S5.** TGA-DSC curves of DMA-Reo-MOF-1 in dry air (a), and in argon (b).

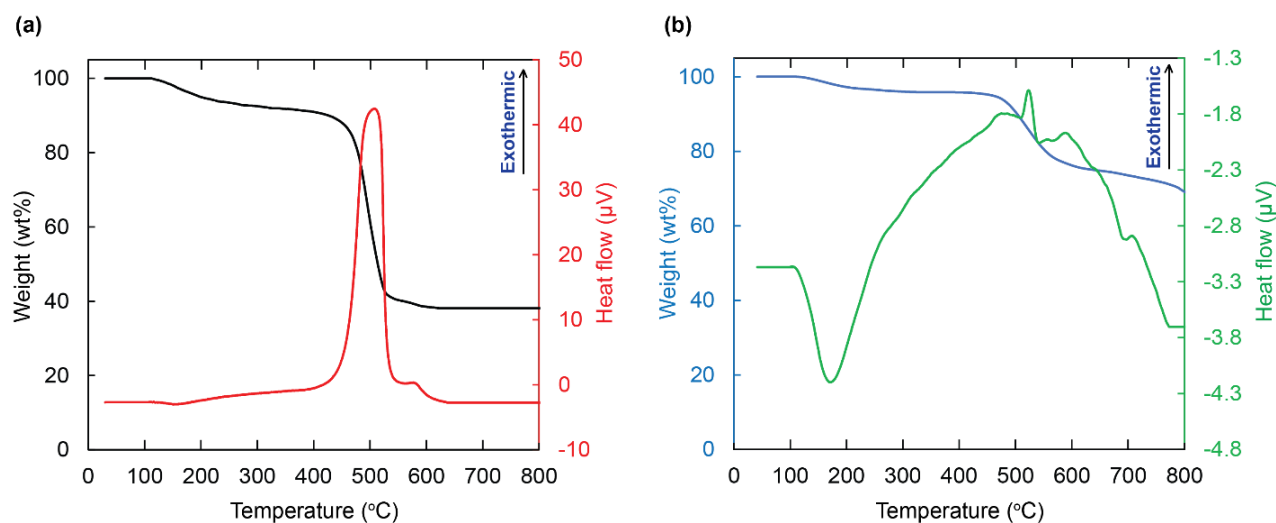

**Figure S6.** TGA-DSC curves of H<sup>+</sup>-Reo-MOF-1 in dry air (a), and in argon (b).

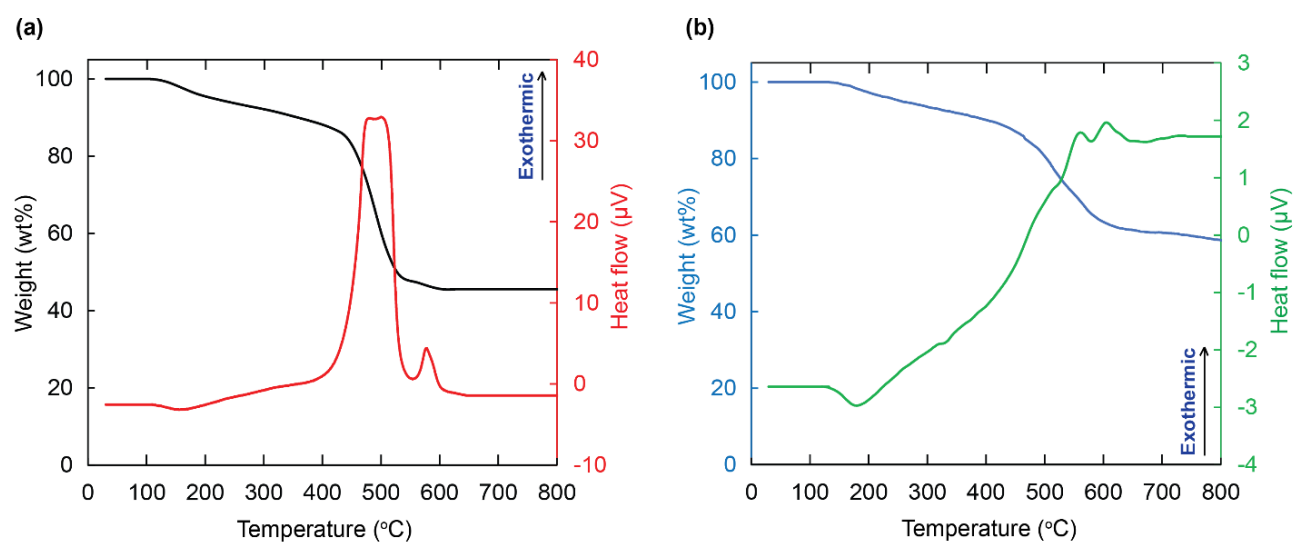

**Figure S7.** TGA-DSC curves of MG-Reo-MOF-1 in dry air (a), and in argon (b).

## Section S6. N<sub>2</sub> adsorption measurement at 77 K

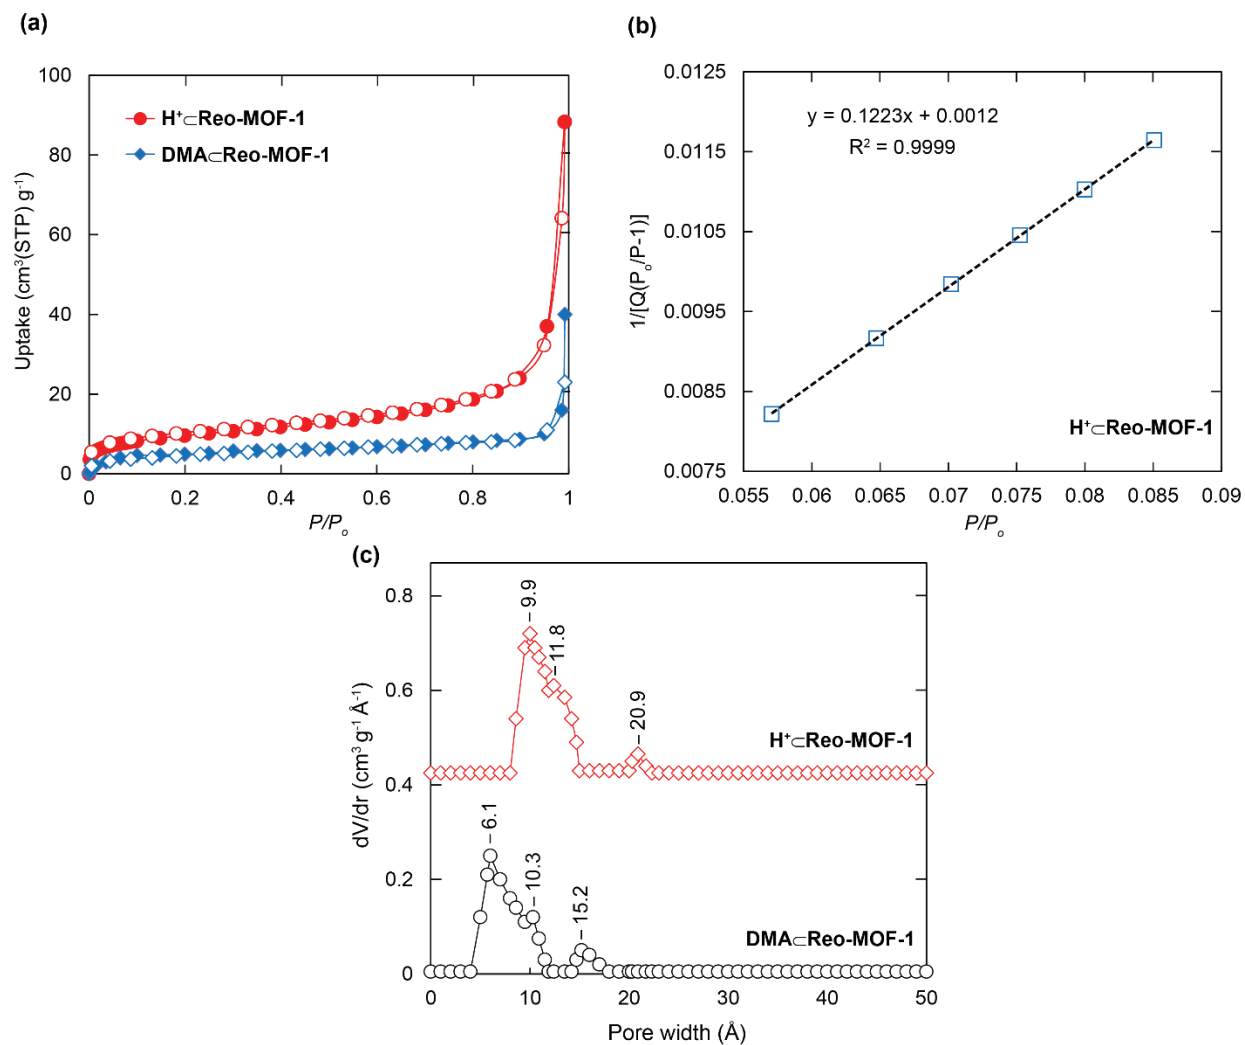

(d)

|                                                       |               |
|-------------------------------------------------------|---------------|
| P/P <sub>o</sub> range                                | 0.057 – 0.085 |
| Correlation coefficient                               | 0.9999        |
| C                                                     | 102.92        |
| Q <sub>m</sub> (cm <sup>3</sup> g <sup>-1</sup> STP)  | 8.0970        |
| Molecular cross-sectional area (S / nm <sup>2</sup> ) | 0.1620        |
| BET surface area (m <sup>2</sup> g <sup>-1</sup> )    | 35.252        |

**Figure S8.** N<sub>2</sub> isotherm and pore size distribution of DMA⊂Reo-MOF-1 and H<sup>+</sup>⊂Reo-MOF-1 at 77 K.

**Section S7.** Scanning electron microscopy (SEM) and energy-dispersive X-ray mapping (EDX-mapping) analysis

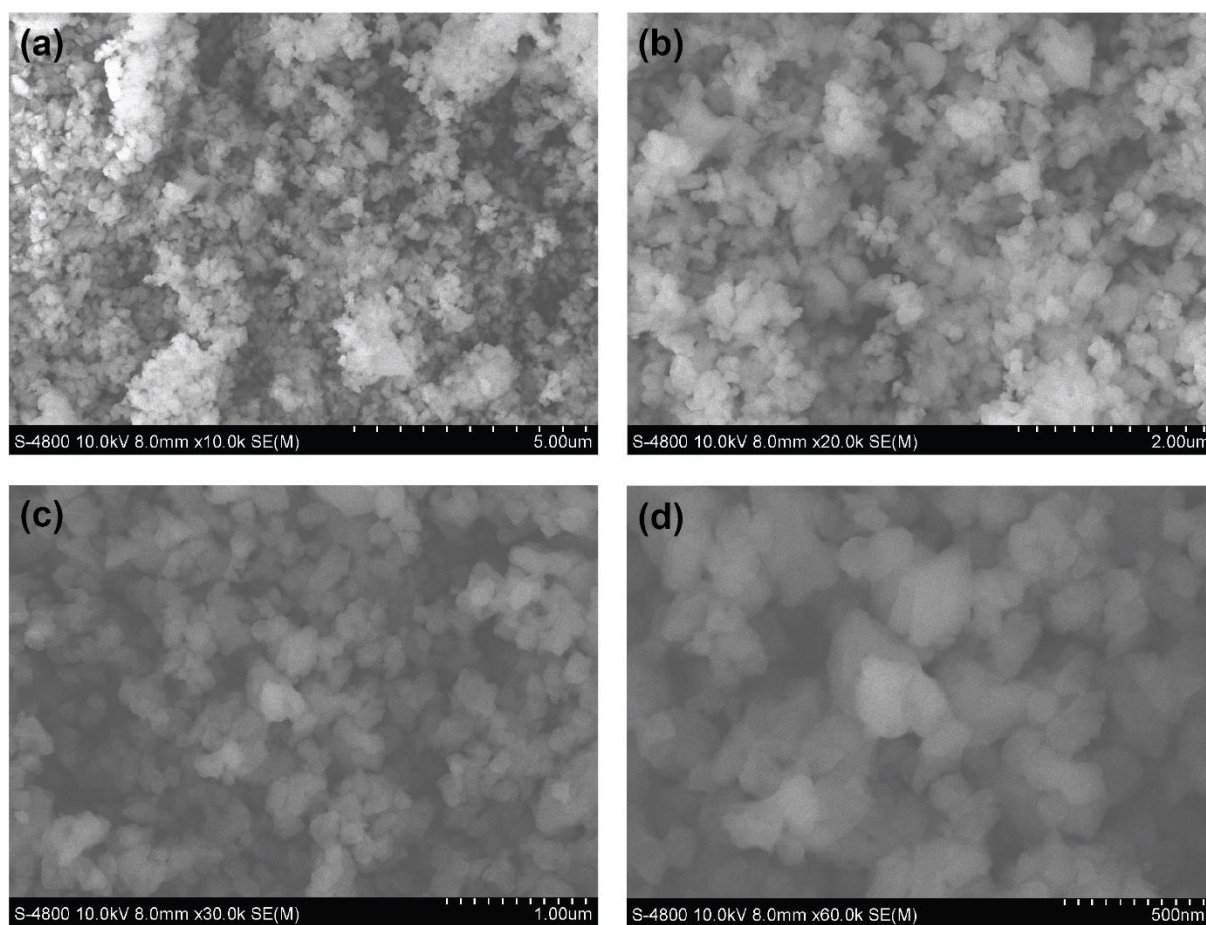

**Figure S9.** SEM images of H<sup>+</sup>@Reo-MOF-1 at different scale bars of 5.00 μm, 2.00 μm, 1.00 μm and 500 nm, respectively.

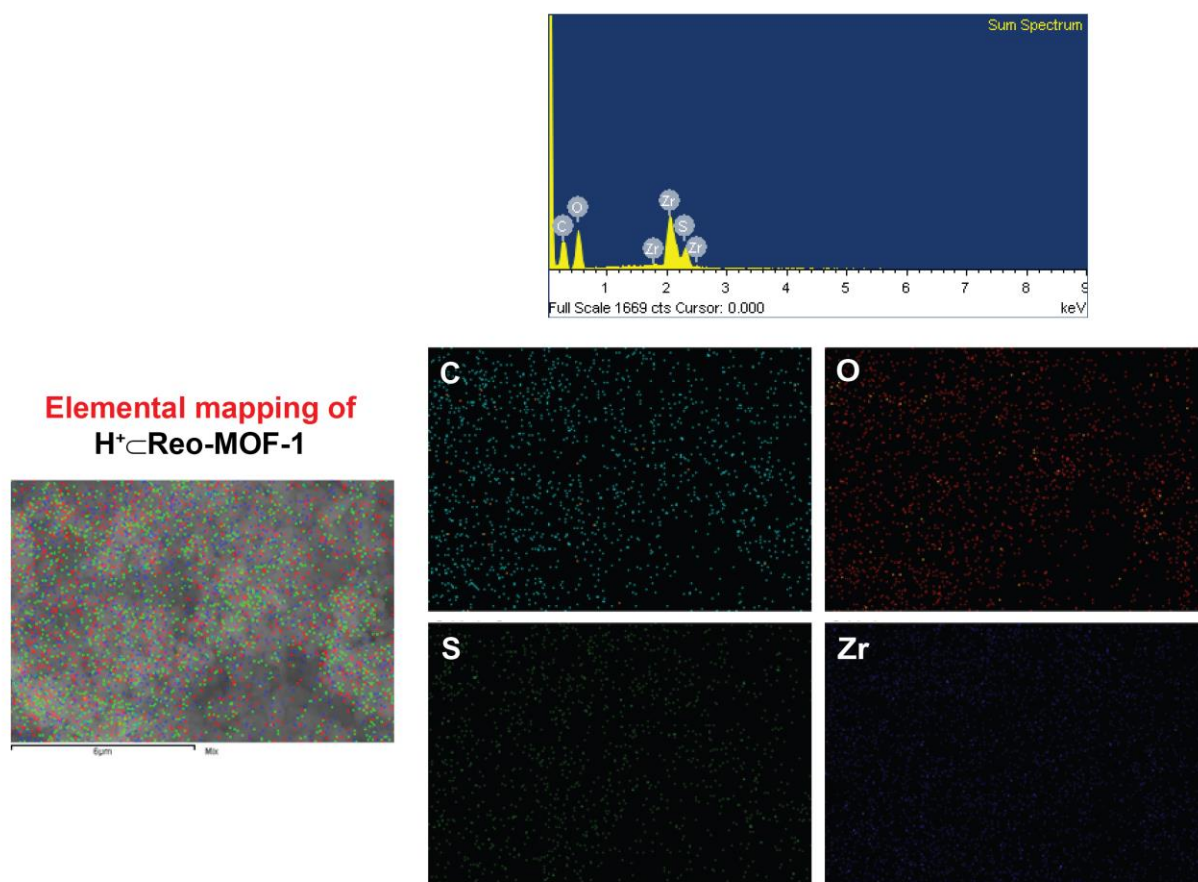

**Figure S10.** Elemental mapping by SEM-EDX of  $H^+@Reo-MOF-1$ .

## Section S8. Transmission electron microscopy (TEM) analysis

**$\text{H}^+\text{Reo-MOF-1}$  before adsorption**

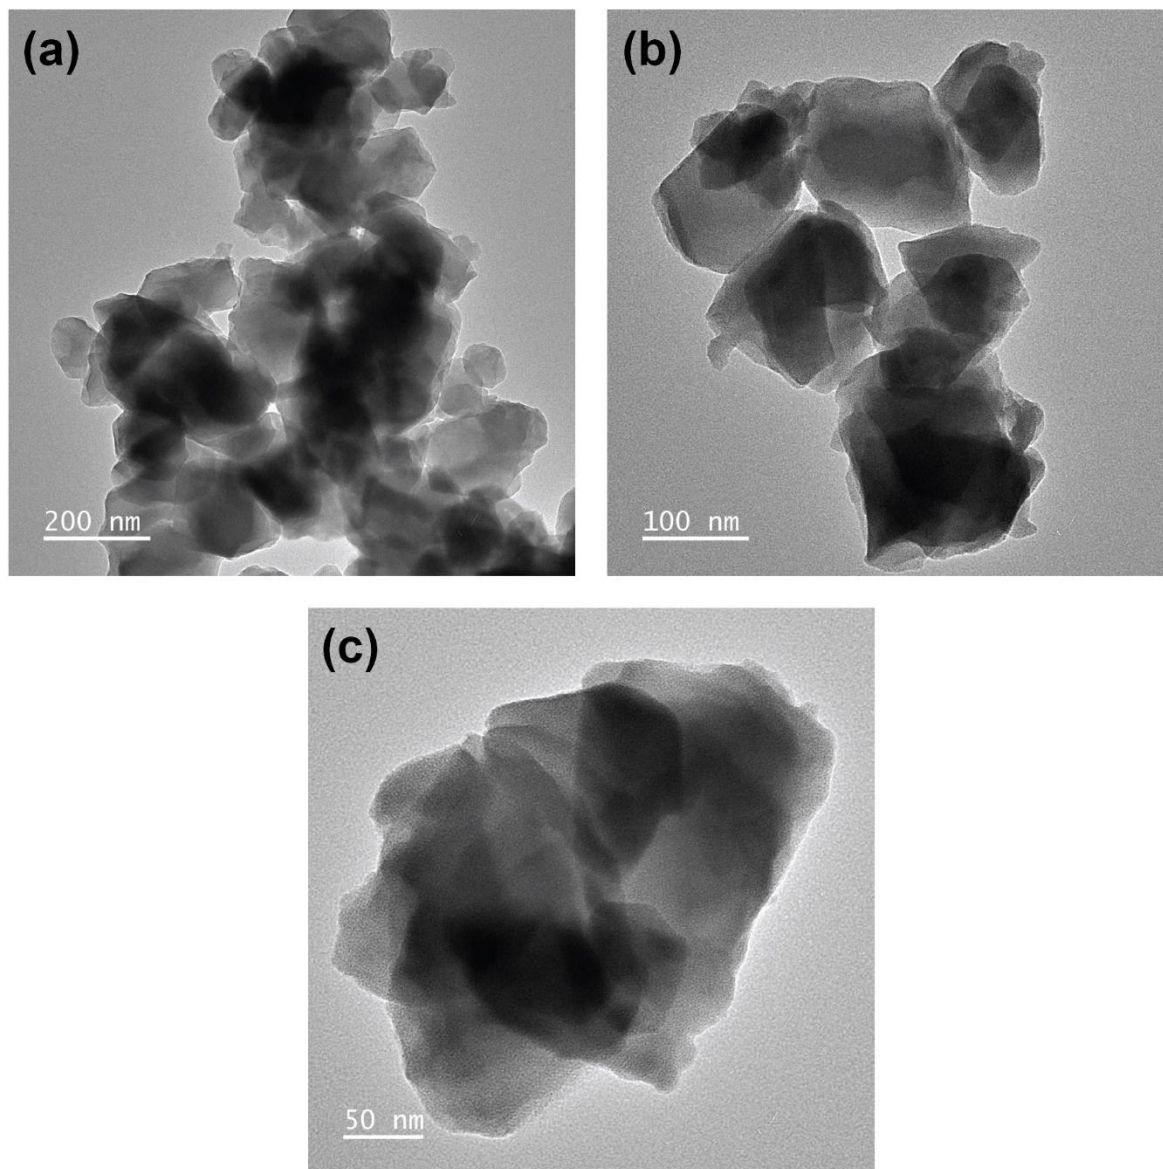

**Figure S11.** TEM images of  $\text{H}^+\text{Reo-MOF-1}$  before adsorption of MG at different scale bars of 200, 100, and 50 nm, respectively.

**$H^+ \subset$  Reo-MOF-1 after desorption**

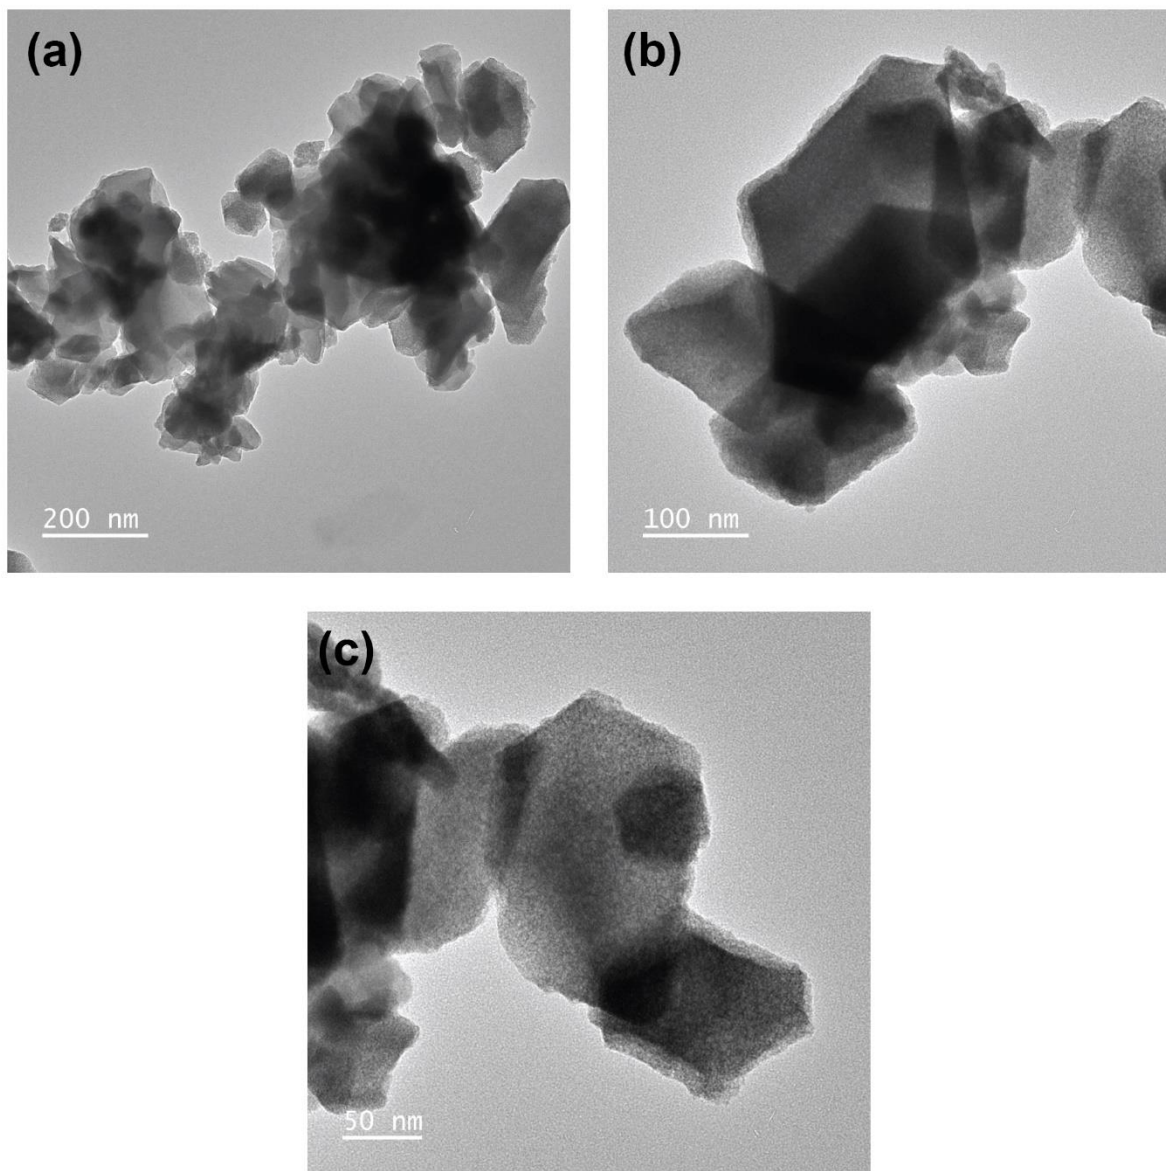

**Figure S12.** TEM images of  $H^+ \subset$  Reo-MOF-1 after desorption of MG at different scale bars of 200, 100, and 50 nm, respectively.

## Section S9. Adsorption studies

### Adsorption isothermal models

The nonlinear forms of the Langmuir and Freundlich are represented by the equations (1) and (2):

$$q_e = \frac{q_m \cdot K_L \cdot C_e}{1 + K_L \cdot C_e} \quad (S1)$$

$$q_e = K_F \cdot C_e^{1/n} \quad (S2)$$

Where  $C_e$  ( $\text{mg L}^{-1}$ ) and  $q_e$  ( $\text{mg g}^{-1}$ ) are the MG concentration and adsorption capacity at equilibrium, respectively,  $q_m$  ( $\text{mg g}^{-1}$ ) is the theoretical maximum capacity of the MG adsorption.  $K_L$  ( $\text{L mg}^{-1}$ ) and  $K_F$  ( $\text{mg g}^{-1} (\text{L g}^{-1})^{1/n}$ ) display the constants of Langmuir and Freundlich, respectively.  $1/n$  value symbolizes the adsorption capacity index of Freundlich isotherm.

The nonlinear types of the Temkin and Dubinin–Radushkevich (DR) are described by the equations (3) and (4):

$$q_e = \frac{RT}{\beta} \ln(k_T C_e) \quad (S3)$$

$$q_e = q_m \cdot e^{-K_{DR} \cdot \varepsilon^2} \quad (S4)$$

Where  $R$  is the gas constant,  $\beta$  and  $k_T$  are the constant of adsorption heat and the constant of Temkin, respectively, and  $T$  is the adsorption temperature.  $\varepsilon$  is a constant,  $K_{DR}$  and  $C$  are the constant of DR isotherm and the adsorption energy per adsorbent molecule, respectively.

The separation factor ( $R_L$ ) is utilized by equation (5):

$$R_L = \frac{1}{1 + K_L C_0} \quad (S5)$$

Where  $C_0$  and  $K_L$  are the initial concentration of MG and the constant of Langmuir, respectively.

### Adsorption kinetics

The pseudo first order, pseudo second order, and intra-particle diffusion models are displayed by the equations (6), (7), and (8):

$$q_t = q_e \cdot (1 - e^{-k_1 t}) \quad (S6)$$

$$\frac{t}{q_t} = \frac{1}{k_2 q_e^2} + \frac{t}{q_e} \quad (S7)$$

$$q_t = k_i t^{1/2} + c \quad (S8)$$

Where  $q_t$  ( $\text{mg g}^{-1}$ ) and  $q_e$  ( $\text{mg g}^{-1}$ ) are the MG uptake amounts at  $t$  and equilibrium time, respectively.  $k_1$  ( $\text{min}^{-1}$ ),  $k_2$  ( $\text{g mg}^{-1} \text{min}^{-1}$ ), and  $k_i$  ( $\text{g mg}^{-1} \text{min}^{-1}$ ) are the rate constants of pseudo first order, pseudo second order, and intra-particle diffusion models, and  $c$  is the constant indicating the thickness of the boundary layer.

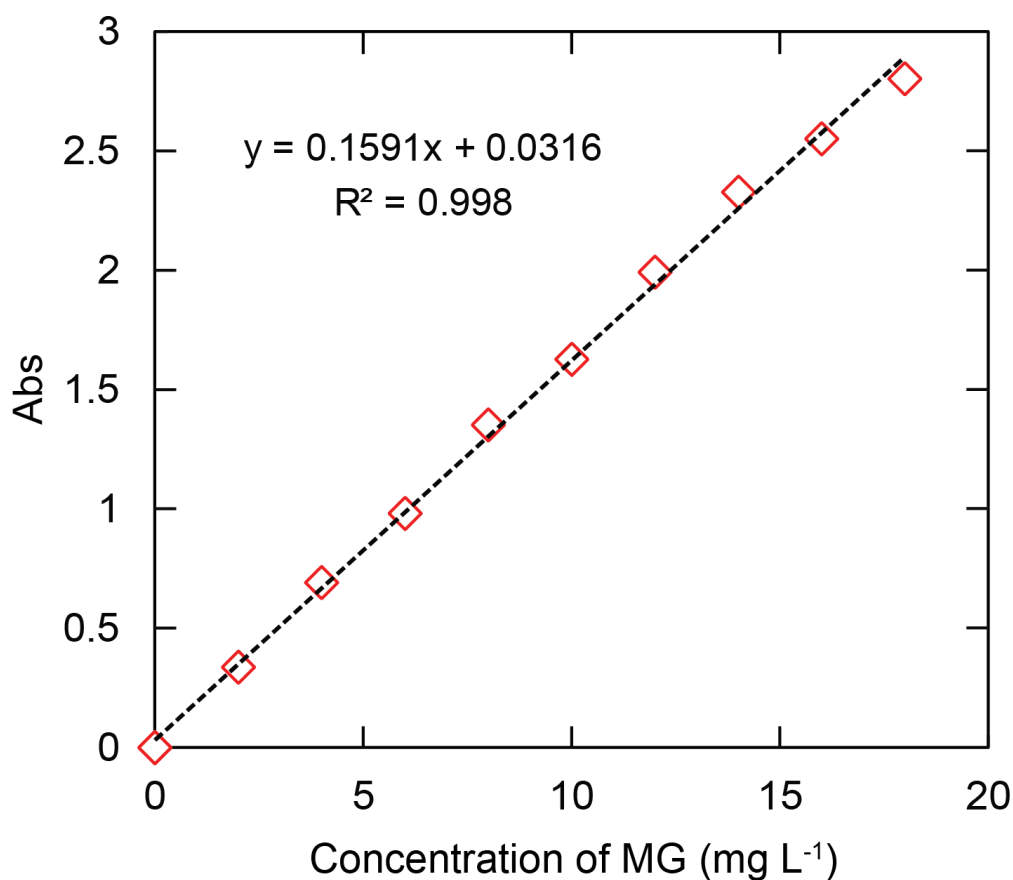

**Figure S13.** The relationship between the absorbed intensity (red dots) of MG and different concentrations of 0 - 18  $\text{mg L}^{-1}$  by linear fitting.

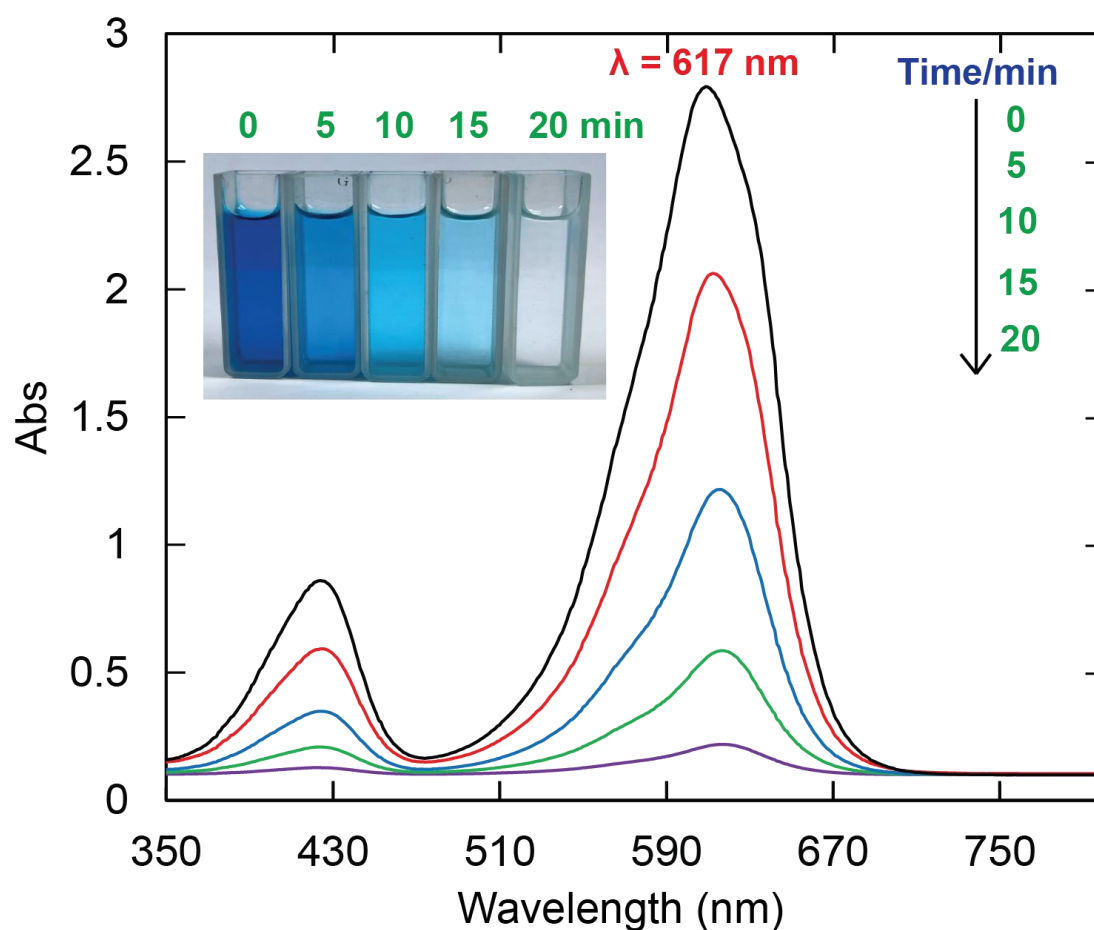

**Figure S14.** UV-Vis spectra of MG dye after absorbed onto H<sup>+</sup>Reo-MOF-1 at the intervals of 0, 5, 10, 15 and 20 min, respectively. Herein, 5 mg H<sup>+</sup>Reo-MOF-1 was introduced into 100 mL of MG solution (18 mg L<sup>-1</sup>) and stirred at room temperature with the mentioned intervals.

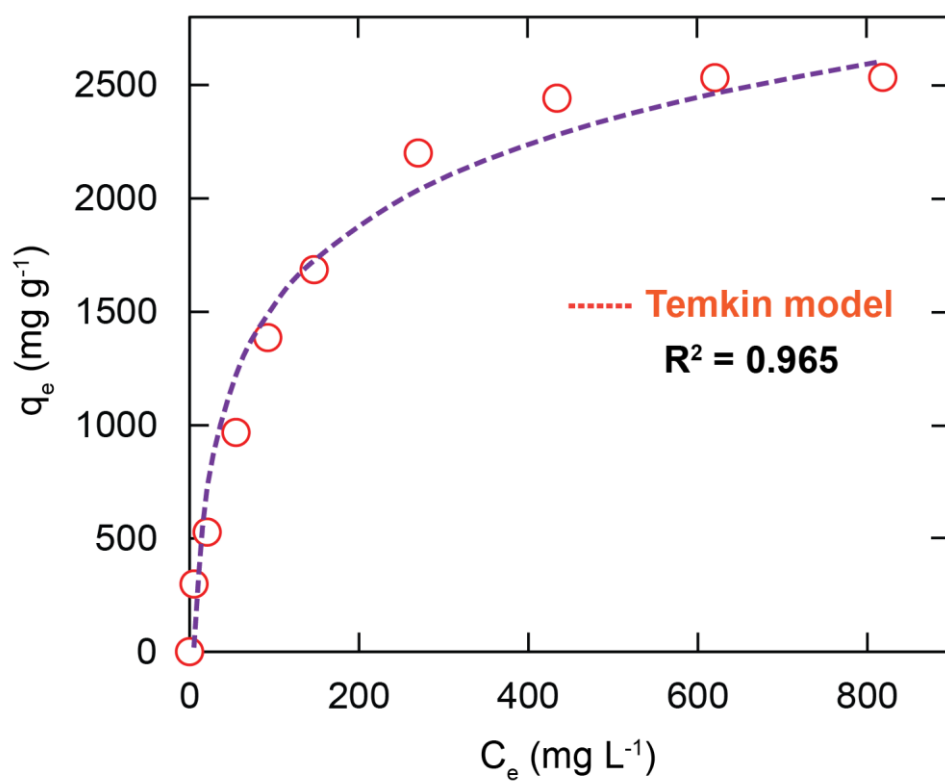

**Figure S15.** Data fitting with the Temkin adsorption isotherm model of the MG adsorption onto  $\text{H}^+\text{@Reo-MOF-1}$ .

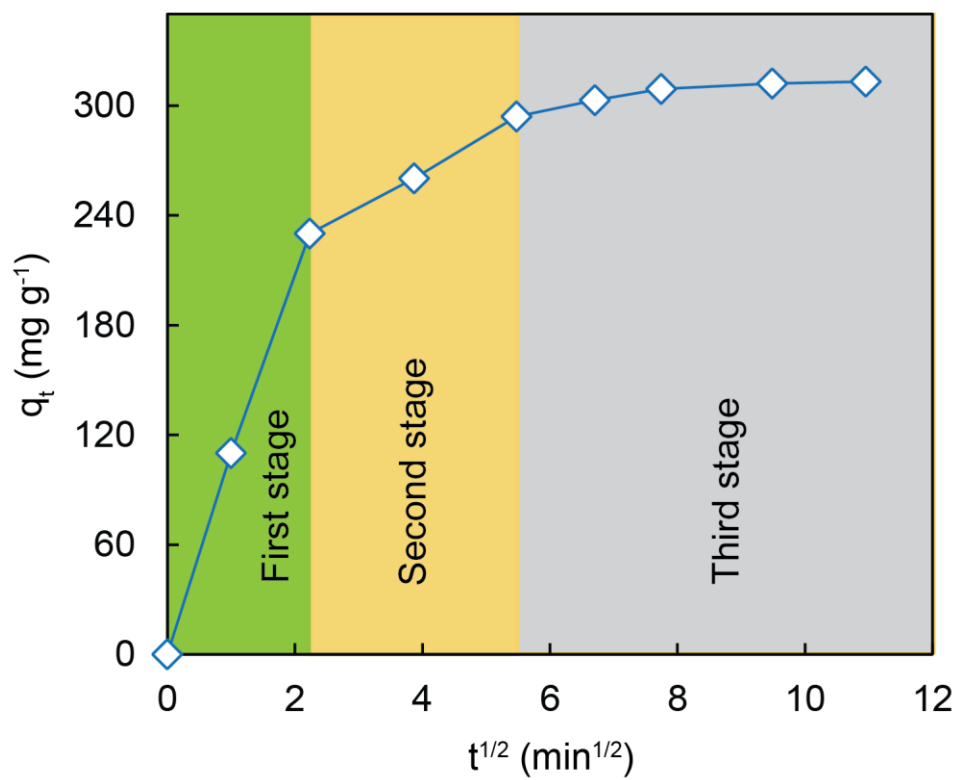

**Figure S16.** Data fitting with the intra-particle diffusion model of the MG adsorption onto H<sup>+</sup>Reo-MOF-1.

**Section S10.** The stability of  $\text{H}^+\text{Reo-MOF-1}$  during the adsorption and desorption process of MG

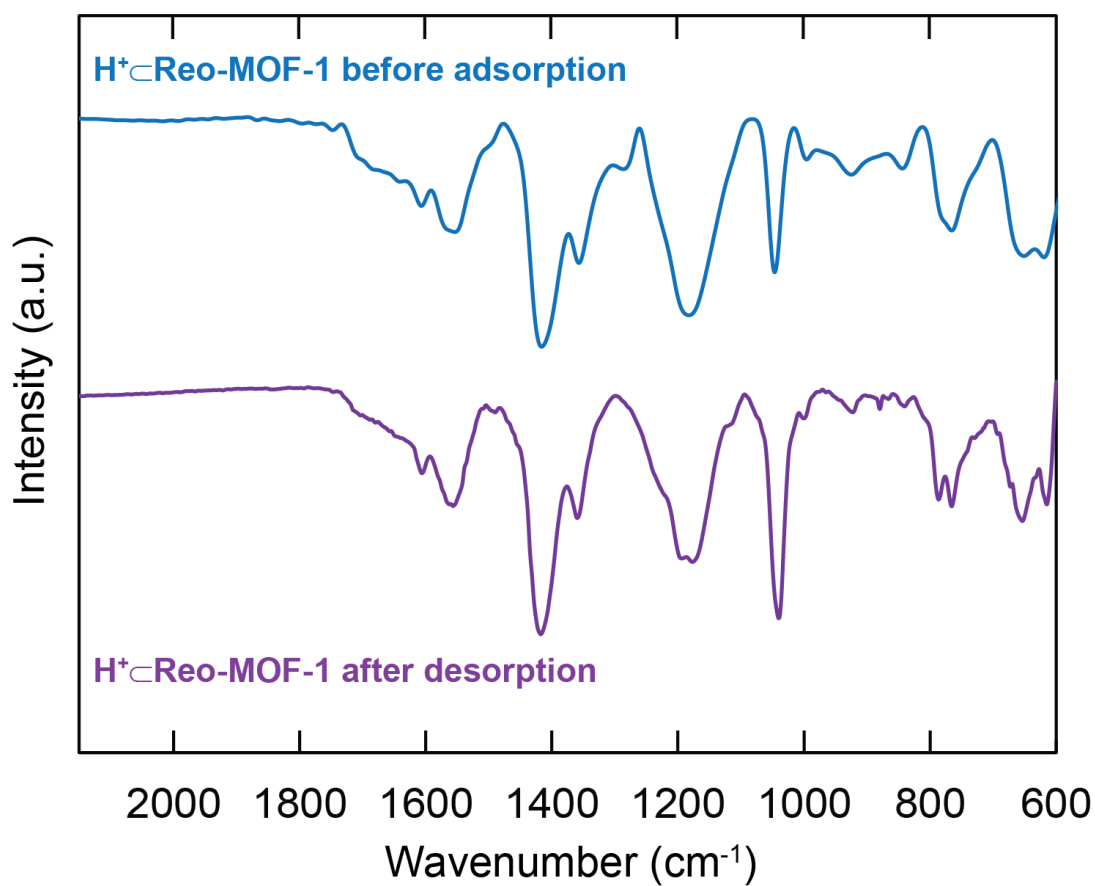

**Figure S17.** FT-IR spectrum of  $\text{H}^+\text{Reo-MOF-1}$  before adsorption of MG (blue) in comparison with FT-IR spectrum of  $\text{H}^+\text{Reo-MOF-1}$  after desorption of MG (purple).

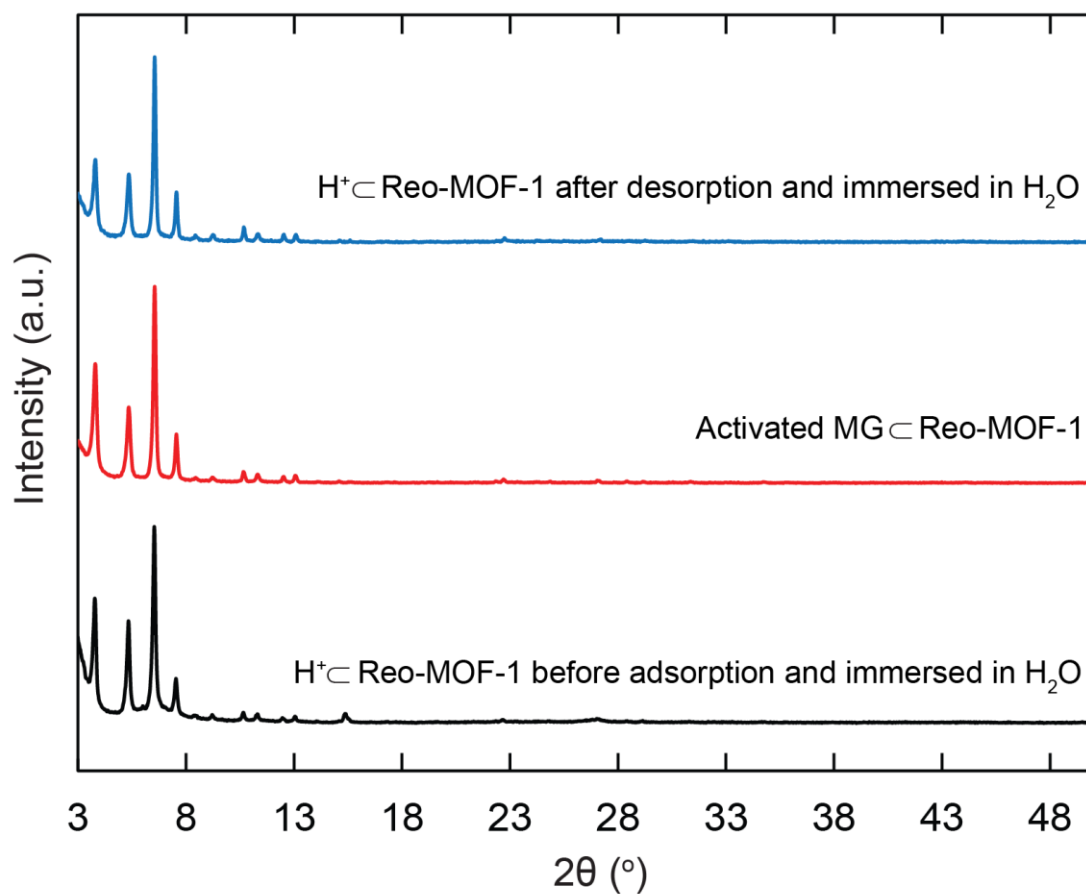

**Figure S18.** PXRD pattern of H<sup>+</sup>Reo-MOF-1 before adsorption of MG and immersed in water (black), and activated MGReo-MOF-1 (red) as compared to the experimental pattern from the subjecting H<sup>+</sup>Reo-MOF-1 after desorption of MG.
